# Supplementary material
Source: publisher site journal article supplement (https://www.dovepress.com/article/234495)
Supplement: Supplementary file 1 [file get_supplementary_file.php]

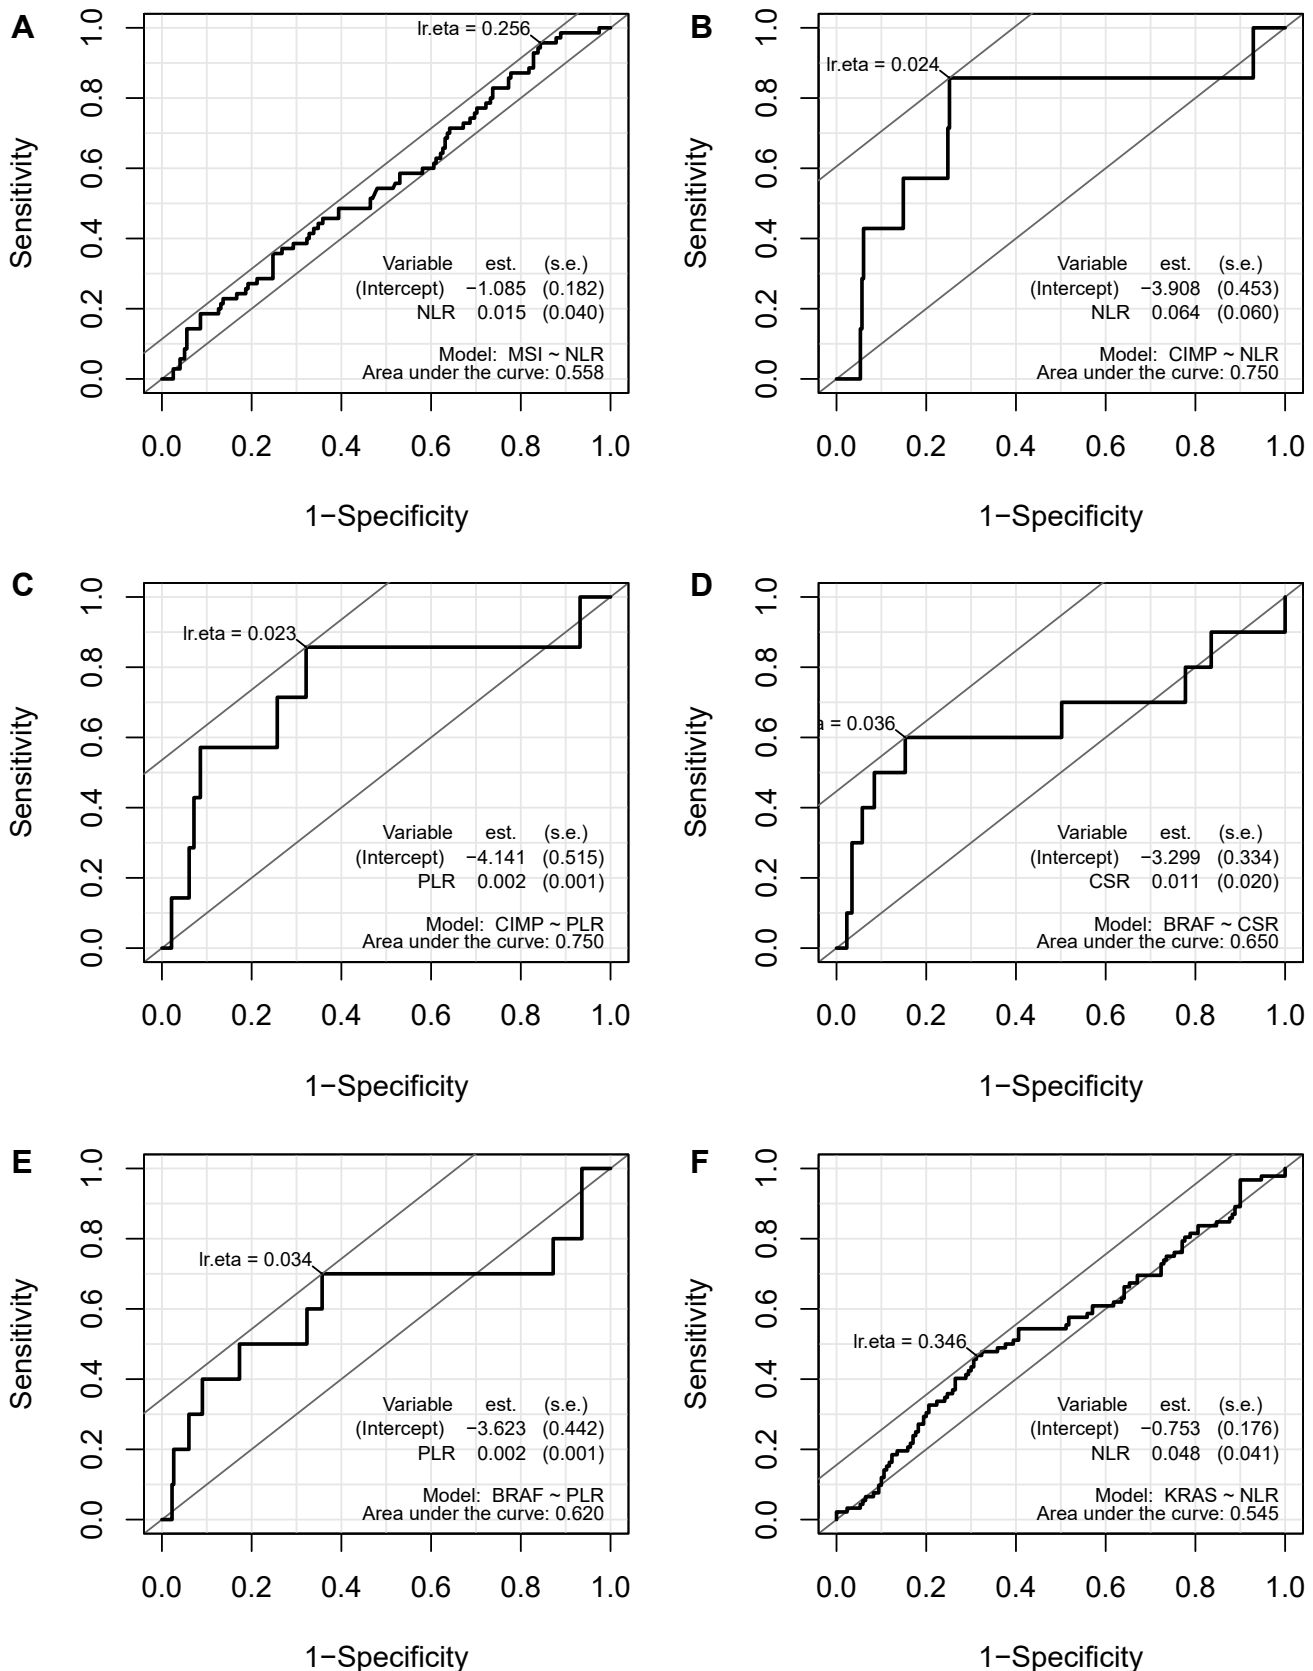

**Figure S1 ROC analysis of variables for prediction of molecular subtypes in CRC patients.**

ROC curves of NLR for the diagnosis of MSI (A), NLR for the diagnosis of CIMP (B), PLR for the diagnosis of CIMP (C), CSR for the diagnosis of BRAF-mutation (D), PLR for the diagnosis of BRAF-mutation (E), and NLR for the diagnosis of KRAS-mutation (F) were shown. ROC, Receiver operating characteristic.

**Supplementary Table 1** Cutoff values of the variables for predicting each molecular phenotype determined by ROC

| variables | <i>KRAS</i> | <i>BRAF</i> | CIMP   | MSI    |
|-----------|-------------|-------------|--------|--------|
| NLR       | 2.49        | 2.88        | 2.88   | 1.24   |
| PLR       | 117.62      | 144.83      | 154.17 | 152.78 |
| CSR       | 0.53        | 1.94        | 1.94   | 0.63   |

MSI, microsatellite instability; CIMP, CpG island methylator phenotype; CEA, carcinoembryonic antigen; CSR, CEA / tumor size ratio; NLR, neutrophil / lymphocyte ratio; PLR, platelet / lymphocyte ratio.
